# Supplementary figures and images for: The heterogeneous composition of working place aerosols in a nickel refinery: a transmission and scanning electron microscope studyPresented at ENVIRONMIN 2001 at Skukuza, Kruger National Park, South Africa, 14–18 July 2001.Electronic supplementary information (ESI) available: TEM bright field images, energy-dispersive X-ray spectra and electron diffraction patterns of various phases observed in the refinery at Monchegorsk; (a) godlevskite, (b) heazlewoodite, (c) bunsenite, (d) trevorite, (e) amorphous sulfate, (f) soot agglomerate with inclusions, (g) bunsenite. See http://www.rsc.org/suppdata/em/b1/b110504n/
Source: Royal Society of Chemistry journal article supplement (doi:10.1039/b110504n), 2002-04-12

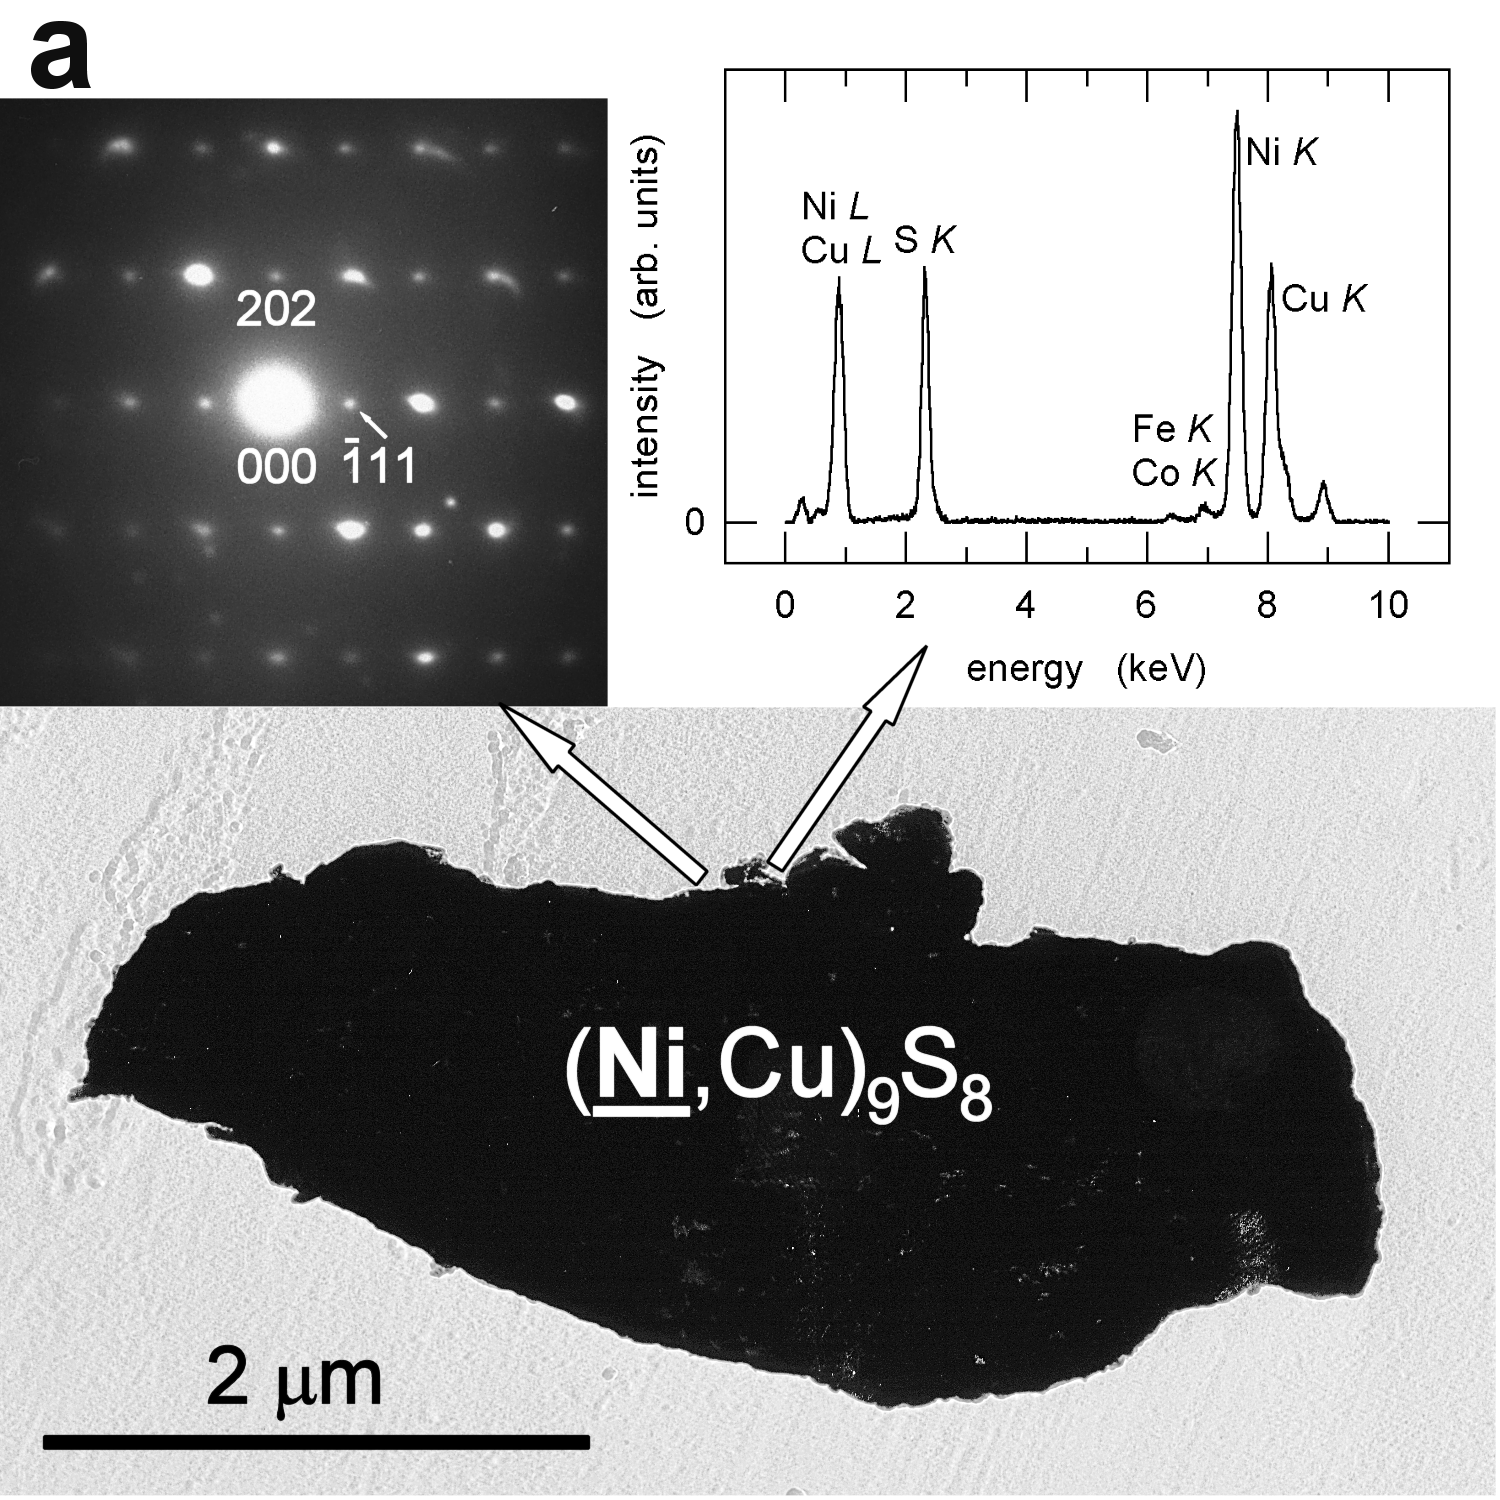


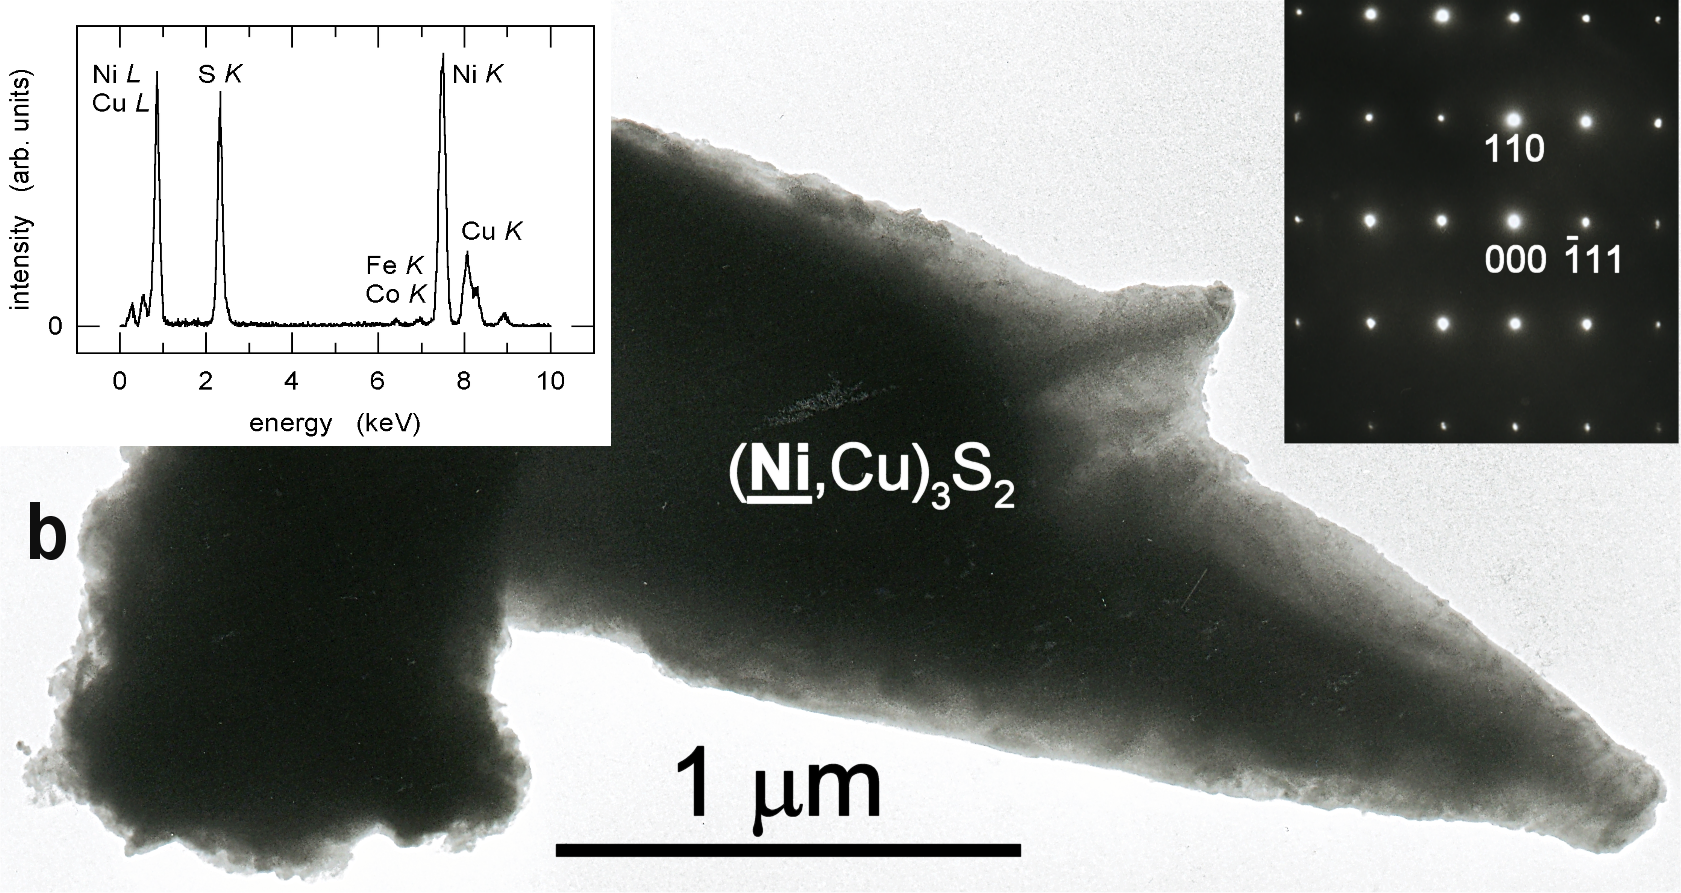


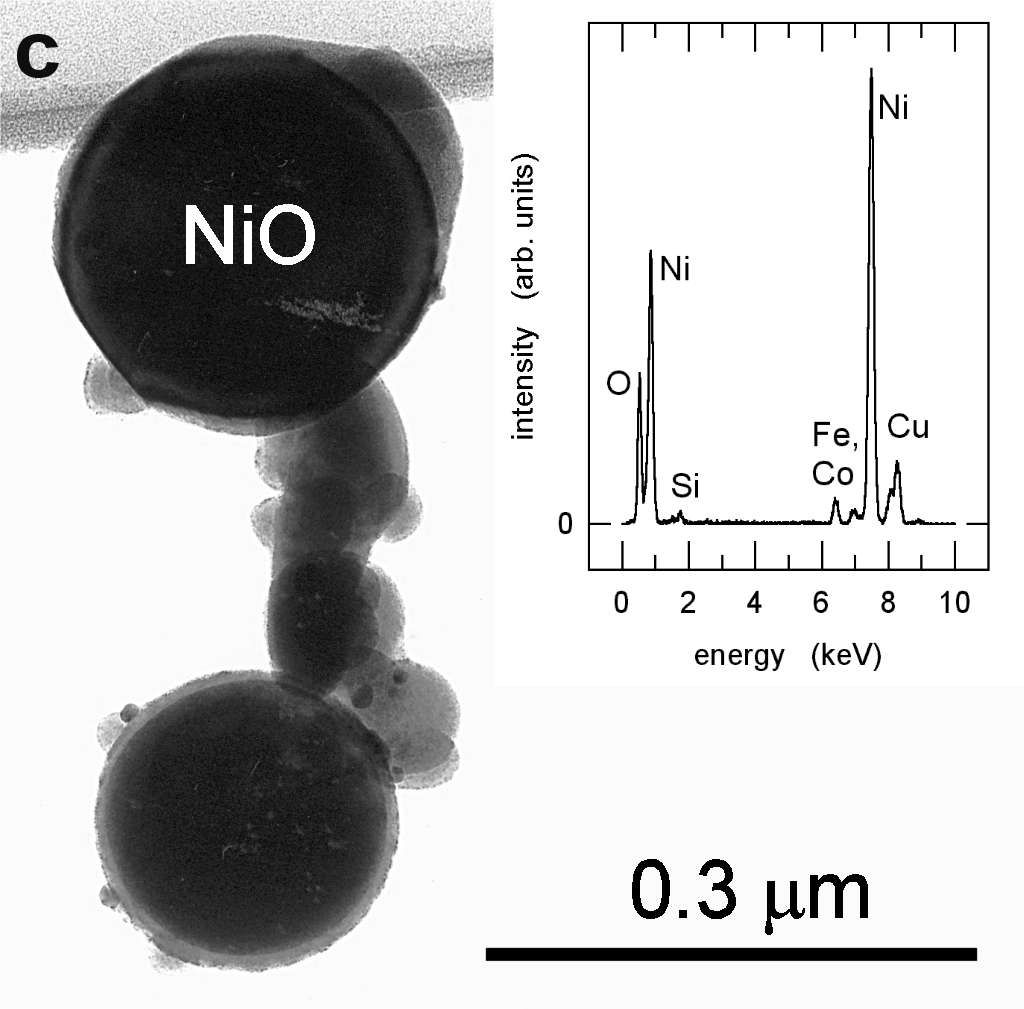


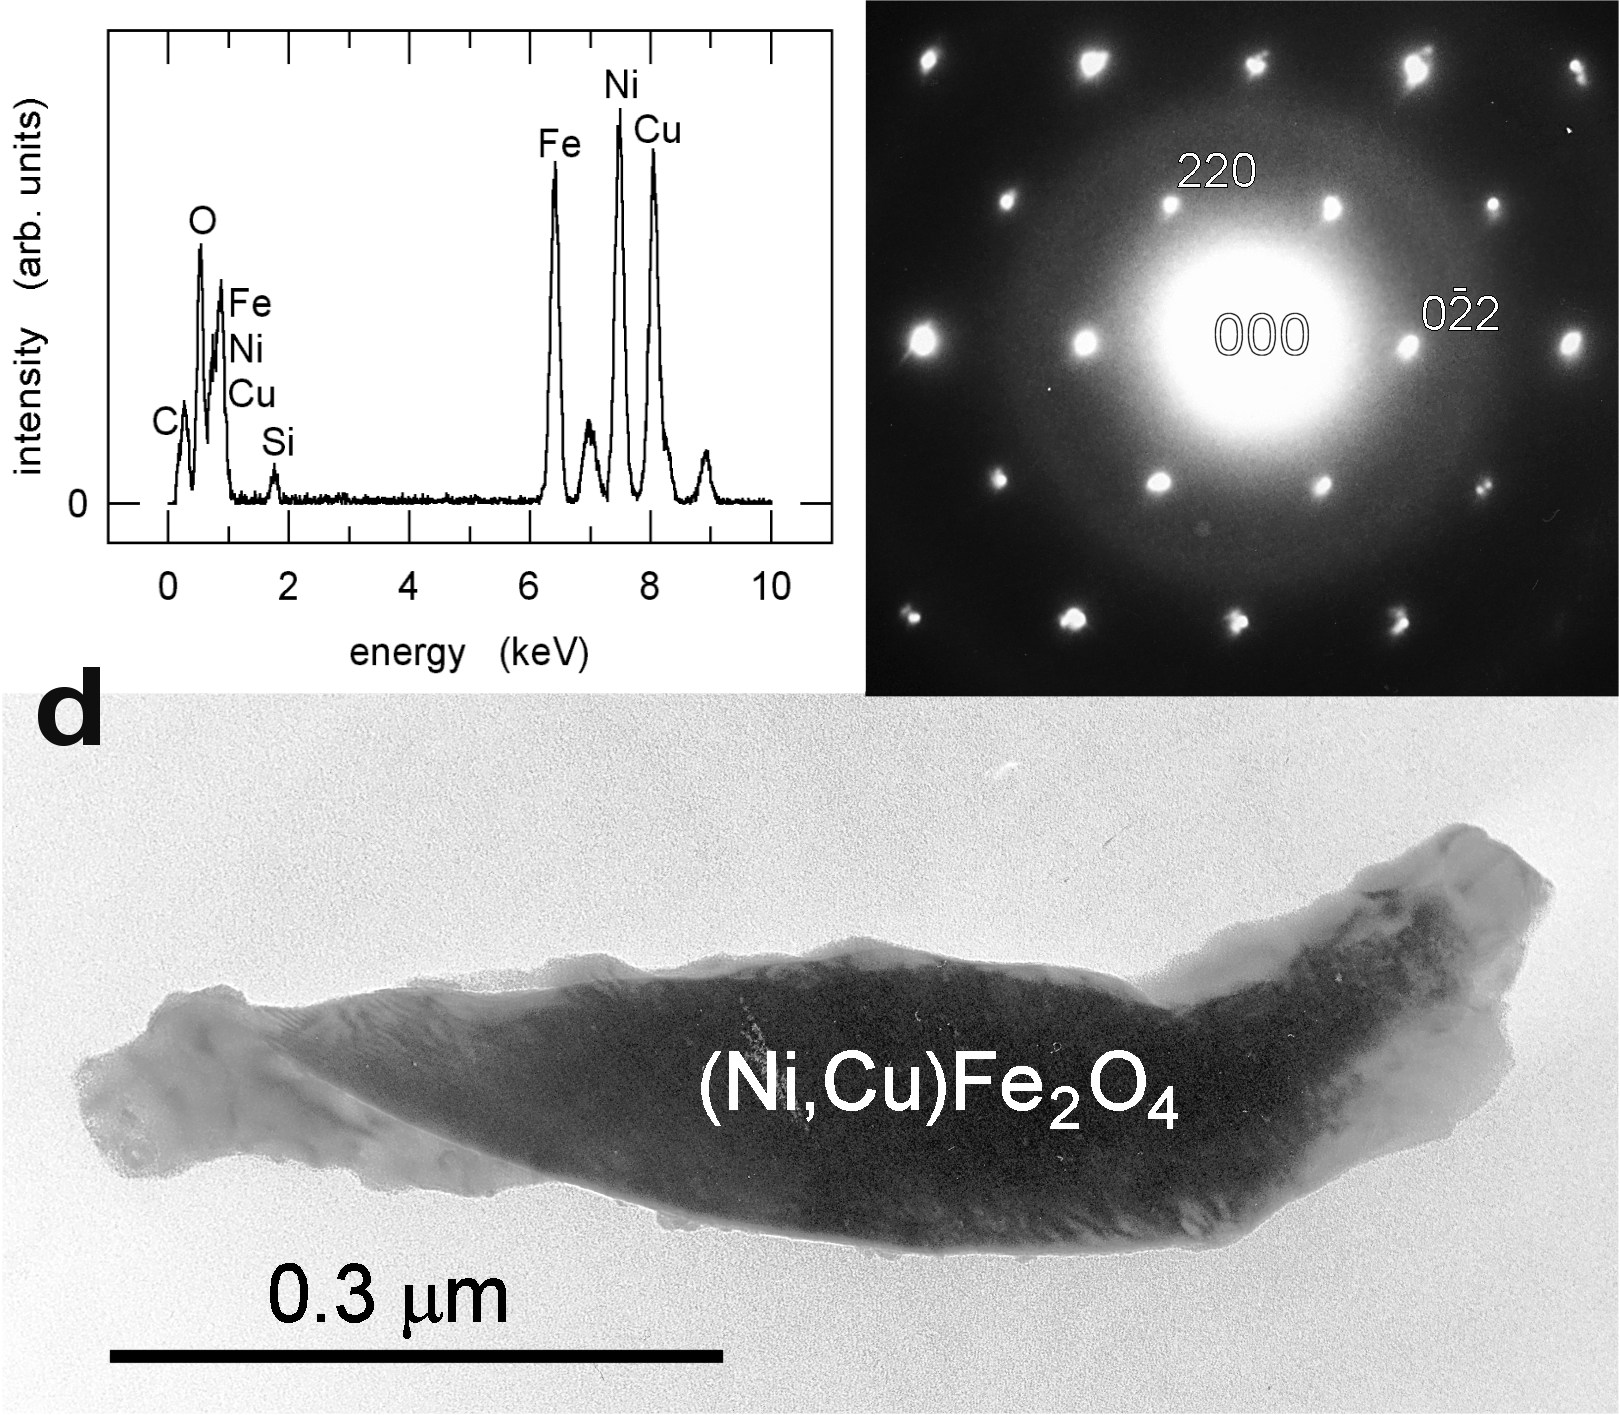


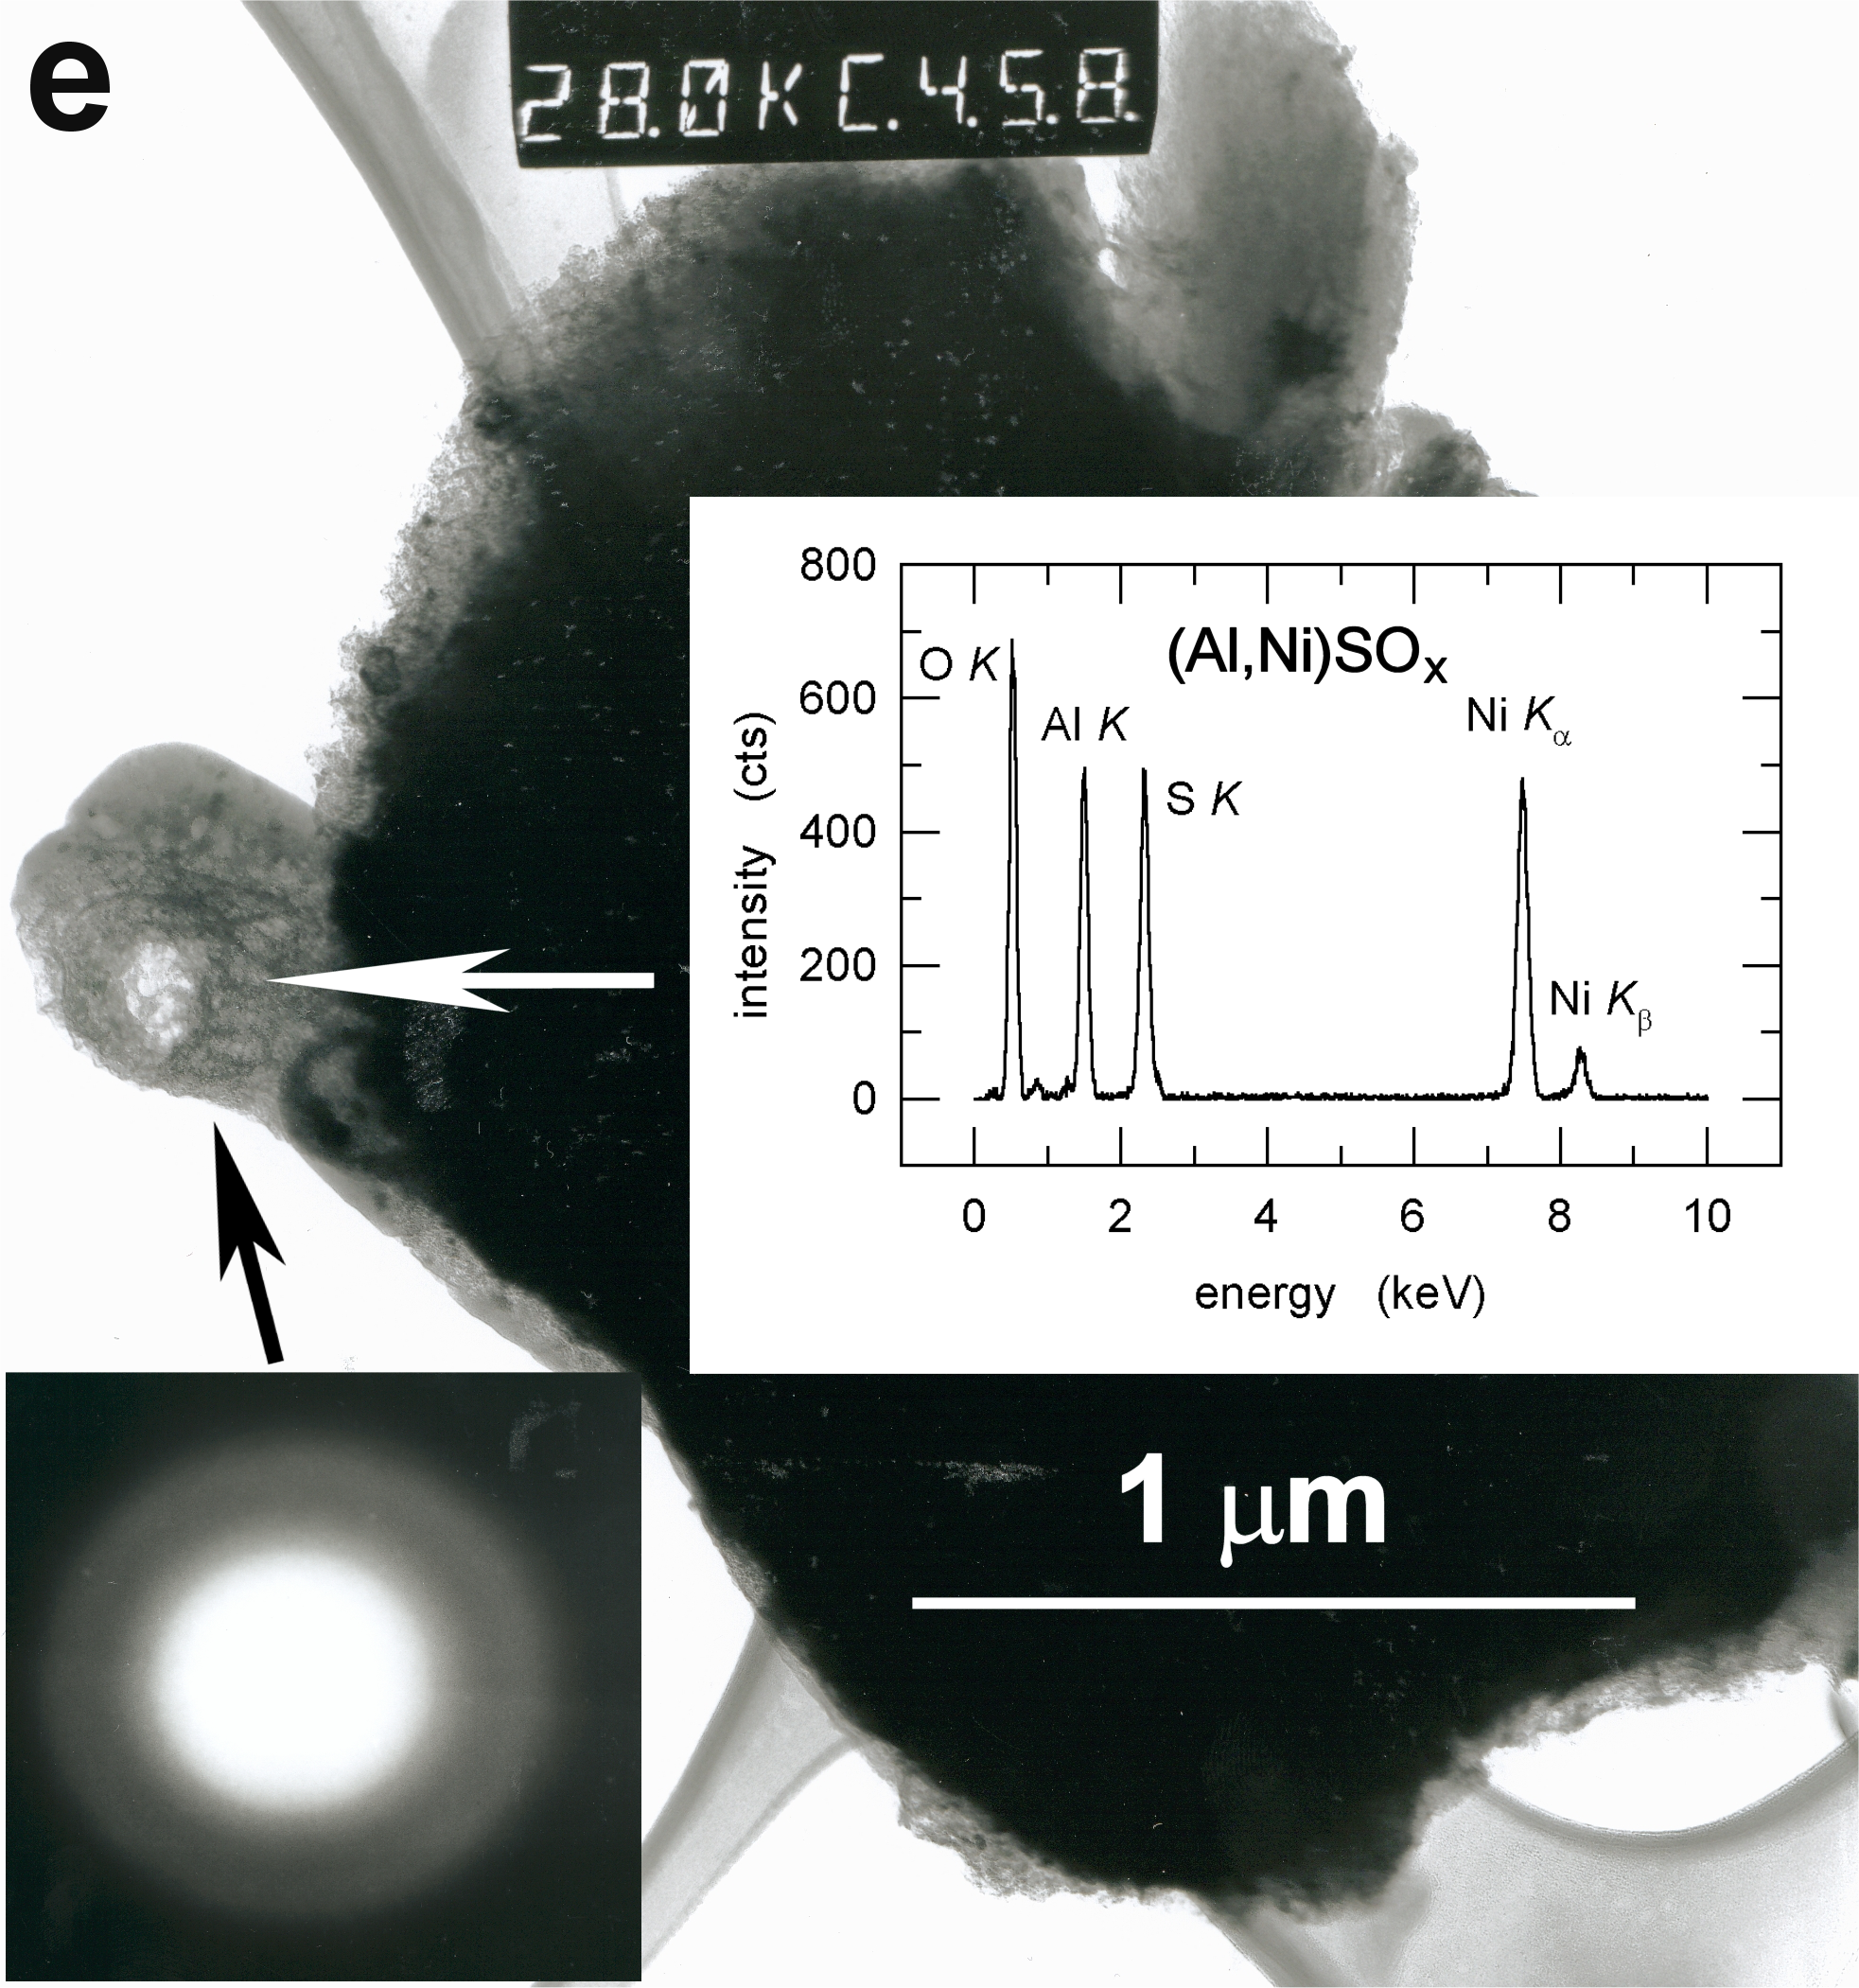


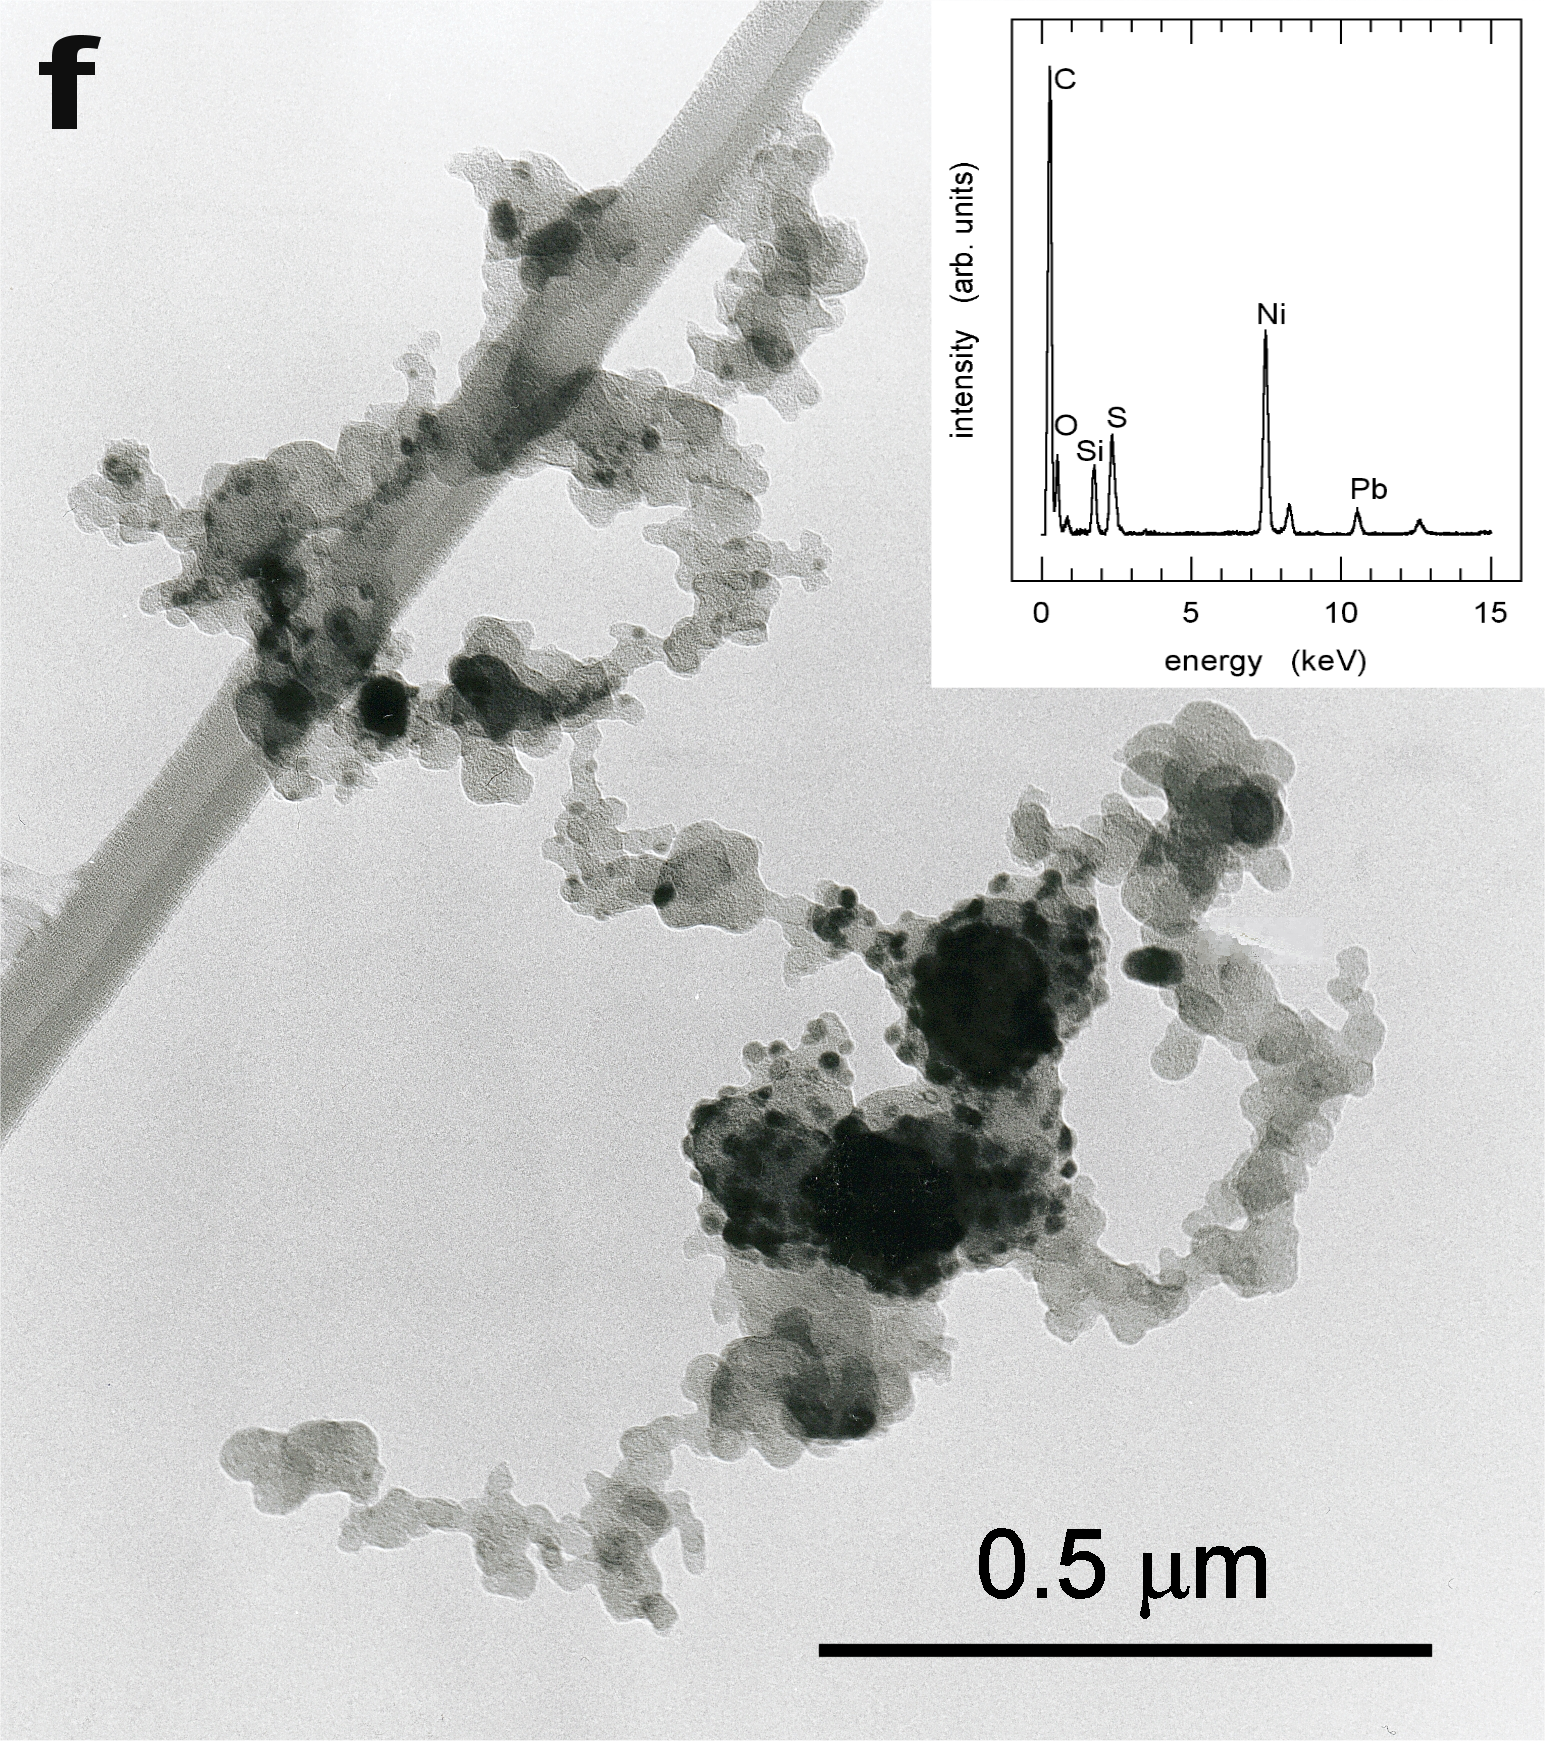


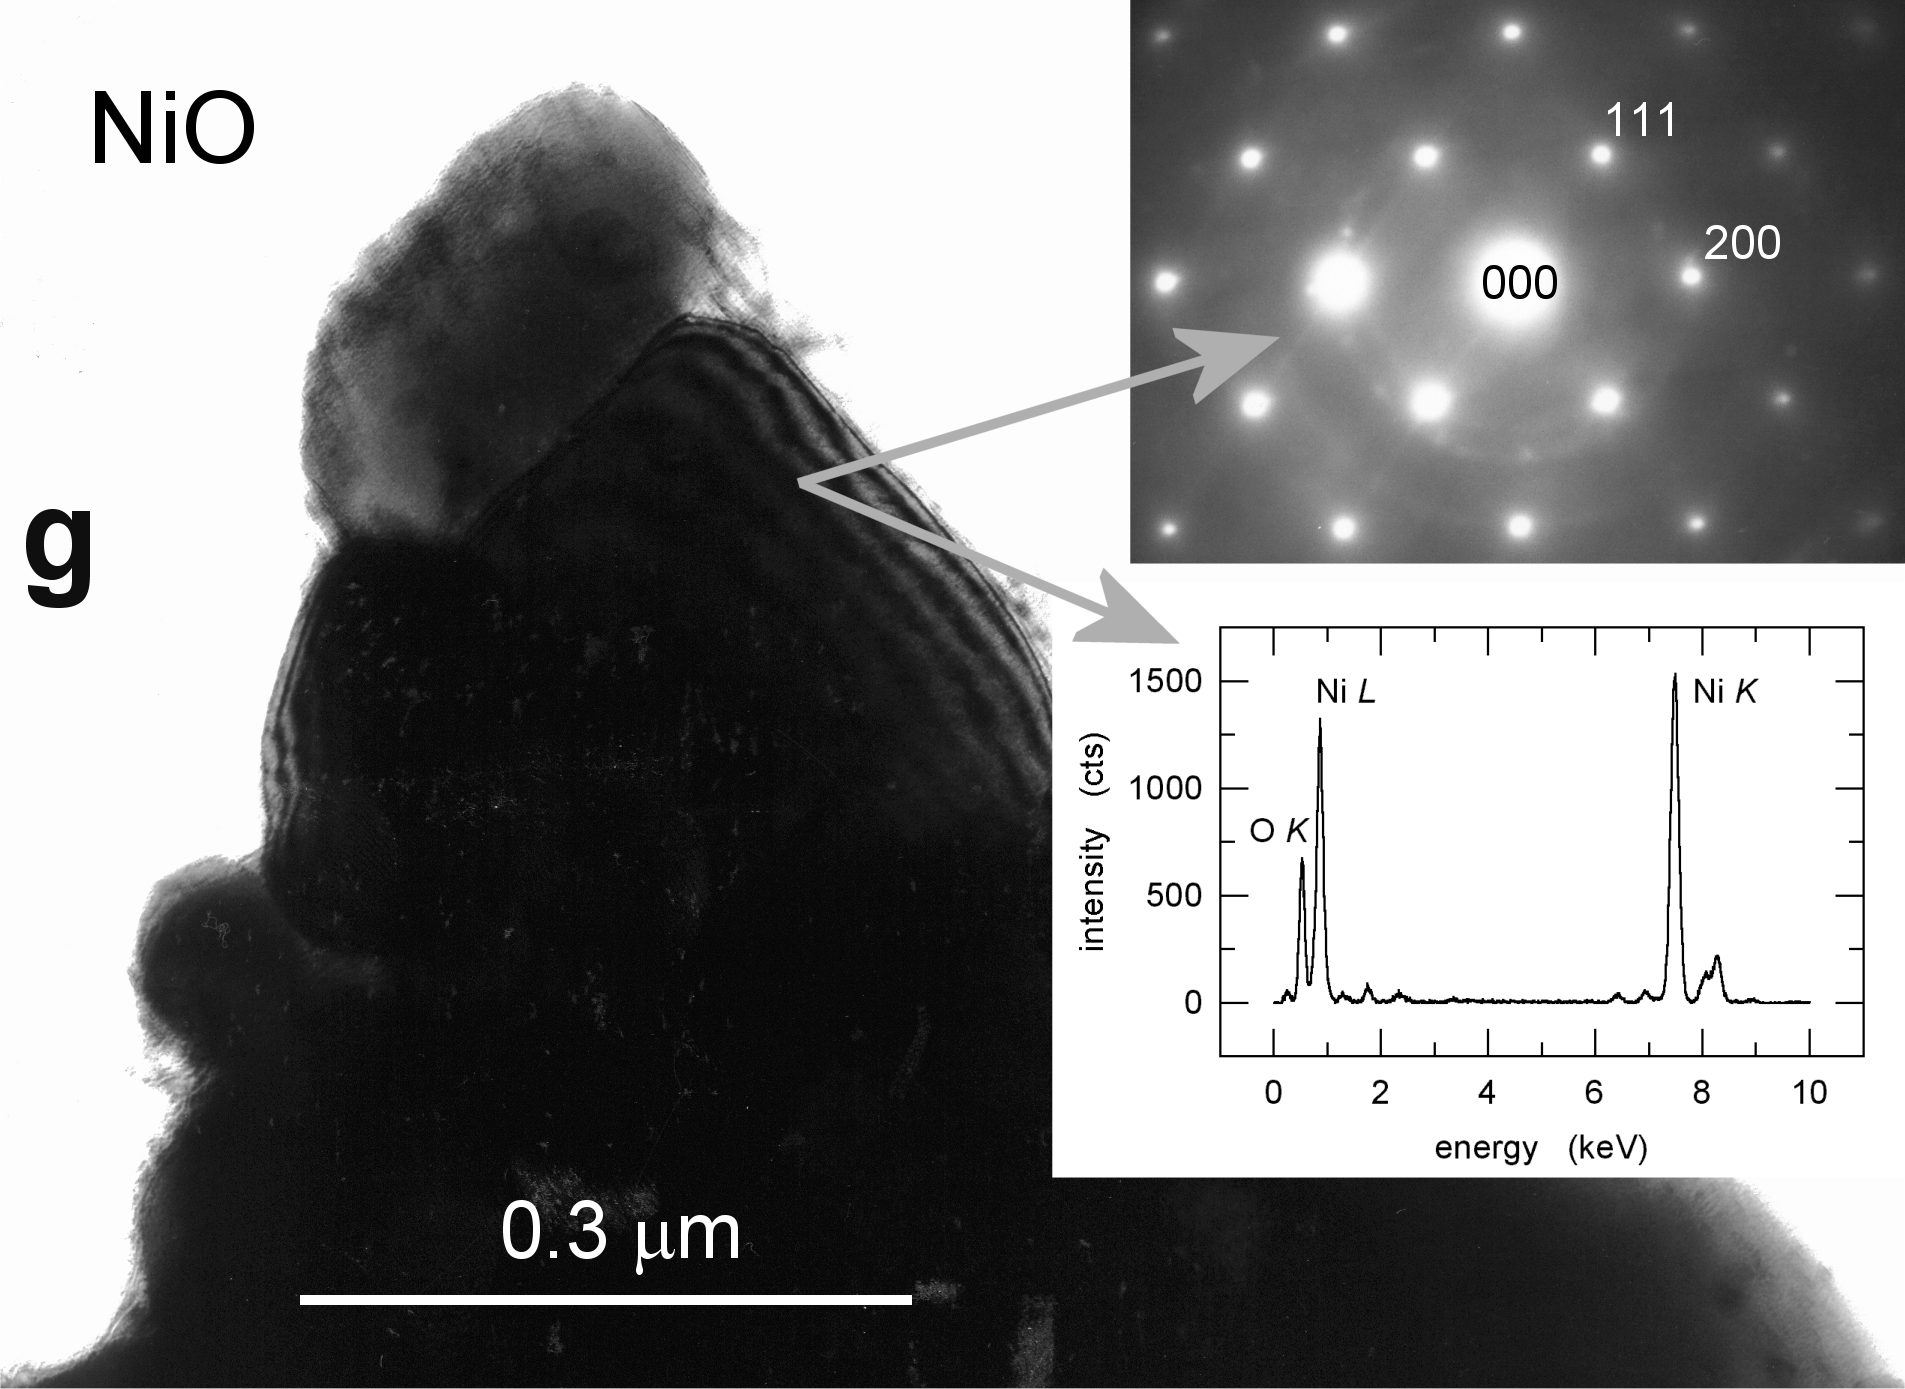

Supplement: figures.doc [file figures.doc]
